# Supplementary material for: What are the barriers to implementation of cardiopulmonary resuscitation training in secondary schools? A qualitative study
Source: PubMed Central journal article supplement — BMJ Open. 2016 Apr 25;6(4):e010481. doi: 10.1136/bmjopen-2015-010481 (PMC4853997; doi:10.1136/bmjopen-2015-010481), 2016-04-25
Supplement: bmjopen-2015-010481supp.pdf [file bmjopen-2015-010481supp.pdf]

**Interview protocol: Focus group interviews among school teachers.**

Interviewer: LZ, MScPH. Co-interviewer: CMH, MD.

The questions were adjusted according to whether the school had implemented CPR training or not.

**1. Intro**

What comes to your mind, when I say CPR training of students?

**2. Experience, organization**

- a) What is your experience with CPR training of students? (individual teacher, school)
- b) Can you describe how you organize CPR training of students? Who is trained (grade) and by whom? Who arranges the training and how (e.g. which part of the school curriculum, training time, training material). What is the role of the school leadership, homeroom teacher etc.?
- c) Can you describe what the training consists of? (CPR/AED/etc., theoretical/practical training, manikins/video)

**3. Barriers and facilitators**

- a) Which considerations have you and the school had about implementing CPR training of students? (if any) What did you perceive as decisive for the decision?
- b) Has the legislation on mandating CPR training influenced these considerations? Are you familiar with the legislation on CPR training? (know it is mandatory?)
- c) What do you see as advantages and disadvantages of student training in CPR? (Individual students, class, school, society)
- d) Do you experience any groups or individuals are pushing for CPR training of students or are against it? Is there support from e.g. school leadership, school board, parents, students? Can you give examples of how you experience it?
- e) What circumstances or factors would make or makes it easier/more difficult (impossible) for you to introduce/continue CPR training of students? What challenges have you experienced? What do you see as the main challenge?
- f) How do you think/experience students react to CPR training?
- g) Do you feel you have the skills to conduct CPR training of students? Which skills do you think are needed to conduct the training? Can you describe how you have been prepared to conduct CPR training of students? Are you yourself interested in conducting CPR training of students?
- h) How would you prefer the training to be organized and why? (e.g. grade, trainer, training time, which part of the school curriculum)

**4. Perceived need**

- a) Do you think there is a need for CPR training of students in school? How important do you think it is?
- b) What is your opinion about CPR training of students being mandatory? Is the school the right place for conducting this training? Why do you think, CPR training of students has become mandatory?

**5. Automatic external defibrillator (AED)**

- a) What comes to your mind, when I say AED? What do you know about AEDs?
- b) Do you have an AED at the school?
- c) Can you imagine AEDs as part of the CPR training of students? What do you think other teachers, students, parents etc. will think about it?

**6. CPR outside the school context**

- a) What do you think about including laypersons in performing CPR in cardiac arrest situations?
- b) What is your opinion about deployment of AEDs in public places? (visibility, importance)
- c) Do you have any personal experience with CPR? (CPR training, witnessed cardiac arrest)
- d) How do you think, you would react if you witnessed a cardiac arrest?
